# Supplementary material
Source: Springer Nature journal article supplement (https://www.springermedizin.de/resource/supplementary/12935_2010_261_MOESM6_ESM.pdf/9540170)

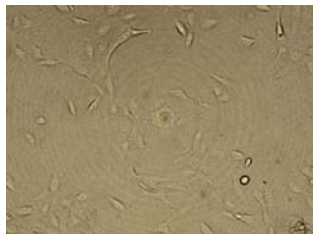

**(a)** +HC/+EGF; 10x

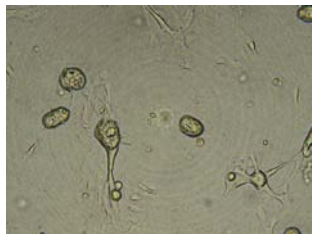

**(b)** -HC/-EGF #11; 10x

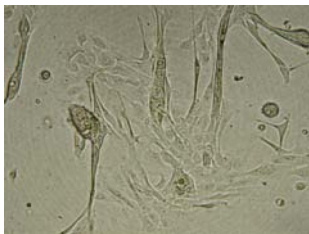

**(c)** -HC/+EGF #13; 10x

Supplement: MOESM6 [file 9540170]
